# Supplementary material
Source: Springer Nature journal article supplement (https://www.springermedizin.de/resource/supplementary/12943_2008_409_MOESM3_ESM.pdf/9554200)

A

GM6914 Treated with Gö6976 for 24 hrs

0 50 100 250 500 1000 nM

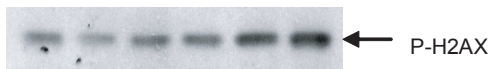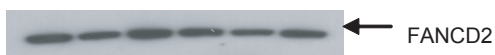

0 0. 0. 0 0 0

← L/S ratio

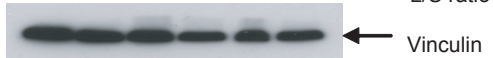

1 2 3 4 5 6

GM6914A Treated with Gö6976 for 24 hrs

0 50 100 250 500 1000 nM

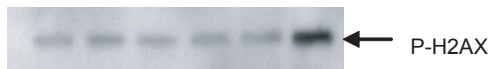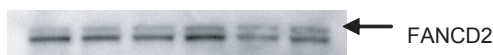

0.2 0.3 0.4 0.5 0.8 0.8

← L/S ratio

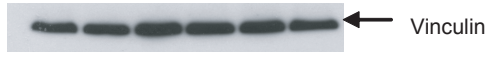

7 8 9 10 11 12

B

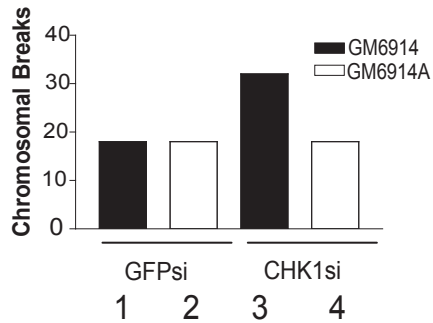

C

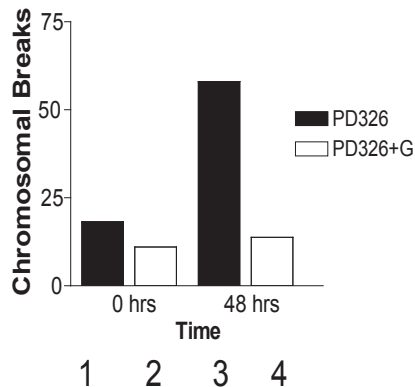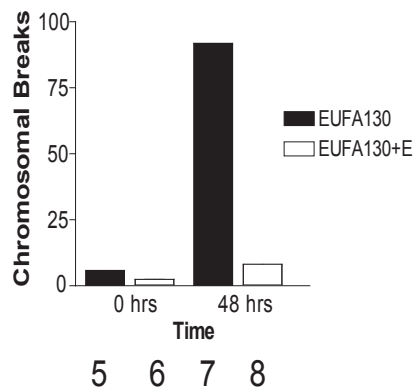

Supplement: MOESM3 [file 9554200]
